1 **An efficient gene excision system in maize**

2 Ning Wang<sup>1</sup>, Maren Arling<sup>1</sup>, George Hoerster<sup>1</sup>, Larisa Ryan<sup>1</sup>, Emily Wu<sup>1</sup>, Keith Lowe<sup>1</sup>, Bill

3 Gordon-Kamm<sup>1</sup>, Todd J. Jones<sup>1</sup>, Nicholas Doane Chilcoat<sup>1</sup> and Ajith Anand<sup>1</sup>

4 <sup>1</sup> Corteva Agriscience, Johnston, IA USA

5

6 [ning.wang@cordeva.com](mailto:ning.wang@cordeva.com)

7 [maren.arling@cordeva.com](mailto:maren.arling@cordeva.com)

8 [george.hoerster@cordeva.com](mailto:george.hoerster@cordeva.com)

9 [larisa.ryan@cordeva.com](mailto:larisa.ryan@cordeva.com)

10 [emily.wu@cordeva.com](mailto:emily.wu@cordeva.com)

11 [keith.lowe@cordeva.com](mailto:keith.lowe@cordeva.com)

12 [william.gordon-kamm@cordeva.com](mailto:william.gordon-kamm@cordeva.com)

13 [todd.j.jones@cordeva.com](mailto:todd.j.jones@cordeva.com)

14 [doane.chilcoat@cordeva.com](mailto:doane.chilcoat@cordeva.com)

15 \* Corresponding author: [ajith.anand@cordeva.com](mailto:ajith.anand@cordeva.com)

16 **Keywords;**

17 *Agrobacterium*; developmentally-regulated promoters; heat-shock promoters; morphogenic

18 genes; marker-free events; rapid maize transformation

19 **Abbreviations;**

20 *Bbm*: Babyboom, *Cre*: CRE recombinase, HSP: Heat-shock promoters, SMG: Selectable marker-

21 free; Pro: promoters, QE: Quality events, UE: Usable event; *Wus2*; Wuschel2

22

23

1 **ABSTRACT**

2 Use of the morphogenic genes *Baby Boom* (*Bbm*) and *Wuschel2* (*Wus2*), along with new ternary  
3 constructs, has increased the genotype range and the type of explants that can be used for maize  
4 transformation. In addition, altering the ectopic expression pattern for *Bbm/Wus2* has resulted in  
5 rapid maize transformation methods that are faster and applicable to a broader range of inbreds.  
6 However, expression of *Bbm/Wus2* can compromise the quality of regenerated plants, leading to  
7 sterility. We reasoned excising morphogenic genes after transformation but before regeneration  
8 would increase production of fertile T0 plants. We developed a method that uses an inducible  
9 site-specific recombinase (*Cre*) to excise morphogenic genes. The use of developmentally  
10 regulated promoters, such as *Ole*, *Glb1*, *End2* and *Ltp2*, to drive *Cre* enabled excision of  
11 morphogenic genes in early embryo development and produced excised events at a rate of 25%-  
12 100%. A different strategy utilizing an excision-activated selectable marker produced excised  
13 events at a rate of 53.3%-68.4%; however, the transformation frequency was lower (12.9%-  
14 49.9%). The use of inducible heat shock promoters (e.g. *Hsp17.7*, *Hsp26*) to express *Cre*, along  
15 with improvements in tissue culture conditions and construct design, resulted in high frequencies  
16 of T0 transformation (29%-69%), excision (50%-97%), usable quality events (3.6%-14%), and  
17 few escapes (non-transgenic; 14%-17%) in three elite maize inbreds. Transgenic events produced  
18 by this method are free of morphogenic and marker genes.

## 1 INTRODUCTION

2           The use of the morphogenic genes *Bbm* and *Wus2* has considerably increased  
3 transformation frequencies and reduced genotype dependence in many cereal crops (Lowe et al.,  
4 2016;Mookkan et al., 2017;Anand et al., 2018;Lowe et al., 2018). This enabled the development  
5 of a rapid transformation method involving direct formation of somatic embryos and T0 plants  
6 from immature scutella (Lowe et al., 2018). This approach has facilitated transformation (Lowe  
7 et., 2016; Mookkan et al.,2017) and CRISPR/Cas-mediated editing (Chilcoat et al., 2017) in  
8 numerous elite maize inbreds, and enabled use of alternate explants, such as embryo slices from  
9 mature seeds or leaf segments, for successful maize transformation (Lowe et al., 2016;Lowe et  
10 al., 2018). However, ectopic expression of the morphogenic genes often resulted in pleiotropic  
11 effects including abnormal shoots/roots and infertile plants (Lowe et al., 2016). The use of  
12 promoters that drive high expression levels during the transformation process, but lower  
13 expression levels in the vegetative plant, provides one option to ameliorate these problems  
14 (Lowe et al.,2018) but the presence of morphogenic genes can still result in some negative effects  
15 and is undesirable in commercial products. While fertile T0 plants can be recovered under these  
16 conditions, non-visible pleiotropic effects remain a distinct possibility. Similarly, transgenic  
17 plants regenerated through *de novo* meristem induction stimulated by morphogenic gene  
18 expression also resulted in developmental abnormalities (Maher et al., 2020), and without  
19 removal also raise concerns that non-visible pleiotropic effects are possible. Therefore, excising  
20 the morphogenic genes is desirable for regenerating healthy plants, for transgene testing and  
21 commercial product development. Previously a method using a non-integrating *Wus2* gene  
22 expression approach recovered fertile T0 plants free-off morphogenic genes, however this  
23 method needed a plant selectable marker gene (SMG) for regenerating events (Hoerster et al.,

1 2020). Here we report an approach that allows excision of both the morphogenic gene and the  
2 SMG used in transformation at the same time. As an added benefit this method eliminates any  
3 adverse effect from the non-trait genes in commercial products.

4 Different strategies have been developed for the removal of helper genes following plant  
5 transformation, often focused on removing plant selectable markers. One approach is co-  
6 transformation with two constructs, one with the SMG and one with the gene of interest. In a  
7 transgenic plant with independent insertions of each of these constructs, the selectable marker  
8 can be segregated genetically (Hare and Chua, 2002;Puchta, 2003;Darbani et al., 2007;Ling et  
9 al., 2016). Alternatively, SMGs can be removed by excision via homologous recombination  
10 (Puchta, 2000;Zubko et al., 2000), elimination by transposition (Maeser and Kahmann, 1991;Gao  
11 et al., 2015) or, by the use of recombinases to excise unwanted DNA. Several recombination  
12 systems have been used to excise SMGs, including *Cre/lox* from bacteriophage P1 (Hoess et al.,  
13 1982;Hoess and Abremski, 1985), *Flp/frt* from *Saccharomyces cerevisiae* (Cox, 1983;Senecoff  
14 et al., 1985), R/RS from *Zygosaccharomyces rouxii* (Araki et al., 1985), and *Gin/gix* from  
15 bacteriophage (Klippel et al., 1988). Recombinases have been delivered via retransformation  
16 (Odell et al., 1990;Dale and Ow, 1991), sexual crosses (Bayley et al., 1992;Kilby et al.,  
17 1995;Kerbach et al., 2005), or transient expression (Gleave et al., 1999;Kopertekh et al.,  
18 2004;Kopertekh and Schiemann, 2005;Jia et al., 2006). In most of these systems excision takes  
19 place after the T0 generation and requires screening multiple plants to find one that has  
20 undergone successful excision. A design where the SMG and the recombinase genes are on the  
21 same construct between the recombination sites has been referred to as “auto-excision”  
22 (Verweire et al., 2007;Moravčíková et al., 2008), and allows generation of SMG-free events. By  
23 placing the recombinase under the regulation of an inducible/chemical promoter, an expression

1 system that allowed spatial and temporal control (regulated by external or intrinsic signals) was  
2 shown to be faster and less resource-intensive (Chong-Pérez and Angenon, 2013;Yau and  
3 Stewart, 2013).

4 We have evaluated three different strategies for auto-excision prior to regeneration to  
5 recover stable T0 plants free of morphogenic genes and in some cases the SMG as well: 1) an  
6 auto-excision system involving developmentally regulated promoters, 2) an excision-activated  
7 marker gene system, and 3) an inducible promoter approach for excising both the morphogenic  
8 genes and the SMG. The excision strategies were evaluated to meet key production  
9 transformation criteria of 1) high transformation frequency, 2) high quality event (QE, single-  
10 copy of T-DNA, backbone and morphogenic gene free) frequency, 3) ability to generate marker-  
11 free T0 plants, and 4) applicability to multiple elite maize inbreds. The use of developmentally  
12 regulated promoters driving *Cre* enabled auto-excision of morphogenic genes, but resulted in  
13 low transformation frequency and QE recovery. These limitations were addressed using heat-  
14 shock inducible promoters driving expression of *Cre*, that resulted in higher frequencies of T0  
15 transformation, gene-excision and QE recovery.

16

### 17 **Excision via developmentally-regulated promoters**

18 The presence of morphogenic genes in transgenic events is undesirable because of unpredictable  
19 phenotypes (Lowe et al., 2016). Auto-excision of morphogenic genes occurs early in the  
20 transformation process which enables trait evaluation in T0 generation and reduces attrition due  
21 to T0 sterility. We evaluated several auto-excision designs, using *Cre* driven by various  
22 promoters. These included seven different developmentally regulated (embryo or meristem)  
23 promoters, the constitutive maize ubiquitin (*ZM-Ubi*) promoter, and the *Agrobacterium* nopaline

1 synthase (*Nos*) promoter (Table 1). To facilitate excision, the morphogenic genes (*Wus2* and  
2 *Bbm*) and the *Cre* gene cassette were flanked with a single pair of directly oriented *loxP* sites  
3 (Figure 1 A). The resulting excised events following auto excision is depicted in Figure 1B. We  
4 evaluated two different inbreds (HC69 and PH2RT) to identify *pro:Cre* combinations that  
5 produced high frequencies of both transformation and excision. Molecular event data is  
6 presented in Table 2. All constructs tested produced stable transgenic events with some number  
7 of properly excised events. The *Ole<sub>pro</sub>:Cre* had the highest transformation frequencies (27.2%-  
8 37.1%), while the *Glb1<sub>pro</sub>:Cre* construct produced events with higher QE frequencies (8.6%-  
9 18.4%).

10

#### 11 **Excision via marker gene activation**

12 Although we achieved auto-excision with all developmentally regulated promoters tested, even  
13 for the best construct the usable events rate was around 2% and 80-90% of events were not  
14 excised quality events. To improve efficiency, we designed constructs with SMG that was  
15 activated only upon excision of the morphogenic genes. This approach selects directly for  
16 excised events and was expected to increase QE frequency. A similar construct design was  
17 previously used to optimize tissue culture conditions for recovering high quality maize  
18 transgenic events (Chu et al., 2019). A schematic design of the construct is depicted in Figure 2A  
19 and the quality excised product in Figure 2B. For these experiments, either the *Glb1* or the *Ole*  
20 promoters were used to drive *Cre* expression for evaluation of excision-activated marker gene  
21 selection. The data from side-by-side testing of these two promoters using the construct design  
22 described in Figure 2 are summarized in Table 3. The construct containing *Glb1<sub>pro</sub>:Cre* improved  
23 T0 transformation and QE frequencies (1.8 and 1.4-fold), compared to the developmentally

1 regulated gene-excision approach. When *Ole<sub>pro</sub>:Cre* was used, the T0 transformation frequency  
2 was similar (>1.1-fold) while the QE frequency increased approximately 1.7-fold. The excision  
3 frequency was higher when excision-activated selection was used, with excision frequencies of  
4 53.3% (*Ole<sub>pro</sub>:Cre*) and 68.4% (*Glb<sub>pro</sub>:Cre*) when compared to the previous approach.  
5 Additionally, no null events (escapes) were identified by qPCR analysis.

6 The *Glb<sub>pro</sub>:Cre* construct design was further evaluated in two additional inbreds, PH84Z  
7 and PH85E, alongside HC69 for comparison (Table 4). QEs were recovered in all three inbreds,  
8 which were free of the morphogenic genes with no escapes. Excision frequency was similar  
9 (55%-61%) across all the inbreds; QE frequencies varied by genotype: 8.7% (HC69), 27.7%  
10 (PH85E) and 6.7% (PH84Z) leading to differences in usable quality event frequency (UE,  
11 quality events per 100 embryos): 4.3% (HC69), 3.6% (PH85E) and 1.9% (PH84Z).

### 13 **Excision via stress-inducible promoters**

14 To further improve efficiency, a series of stress-inducible promoters were tested for excision of  
15 morphogenic genes. The promoters were selected from a set of genes induced by heat (maize  
16 *Hsp17.7* and *Hsp26*) and drought (*ZmRab17*, *SiRAB21*, *BdDRP1*, and *BdDRP12*). The construct  
17 design is identical to that described in Figure 1, where stress-inducible promoters drive *Cre*  
18 expression as represented by *pro:Cre*. The different steps in the transformation process,  
19 selection immature embryo infection, In preliminary screening, embryos derived from HC69  
20 were infected with one of the six constructs and, subsequently subjected to one of three different  
21 conditions: no heat shock (control), heat shock at 37°C for 1 day, or 42°C for 2h/day for 3  
22 consecutive days. The different steps in maize immature embryo transformation process,  
23 included embryo infection with *Agrobacterium* strain containing the construct (Figure 3A),

1 selection of transgenic events on media supplemented with selectable marker (Figure 3B), heat-  
2 shock treatment step (Figure 3C), regeneration of events on media with selection pressure  
3 (Figure 3D) and rooting (Figure 3E), before the events were sent to greenhouse. The auto-  
4 excision frequencies under induced and non-induced conditions were determined by qPCR  
5 analysis. Somatic embryos on maturation media (18 dpi) with 0.1 mg/L imazapyr were subjected  
6 to one of the heat conditions and moved onto a rooting media with 0.1 mg/L imazapyr following  
7 heat shock (Figure 3D).

8 All promoters except *Hsp26* were leaky under non-induced conditions, resulting in gene-  
9 excision rates from 3.4% (*Rab17<sub>pro</sub>*) to 36% (*BdRab21<sub>pro</sub>*) compared to zero in the *Cre*-minus  
10 construct. For a subset of the promoters (*Hsp1.7*, *Hsp26*, *Drp1* and *Drp12*), higher excision  
11 frequencies ranging from 43% to 100%, were observed in the 42°C, 2h/day for 3 days heat  
12 treatment. Longer exposure of the somatic embryos at 37°C adversely effected T0 event  
13 recovery, compared to a short pulse of heat shock at 42°C (2hr/day for 3 days). Based on the  
14 recovery of excised T0 events with *Hsp26<sub>pro</sub>* construct at 42°C treatment compared to 37°C  
15 treatment, this promoter appeared to be induced only at higher temperatures.

16 Additional experiments were performed to further evaluate gene excision and optimize  
17 heat shock conditions using three of the inducible promoters (*Hsp17.7*, *Hsp26* and *Drp12*). HC69  
18 embryos infected with the three constructs were subjected to heat shock treatment at the  
19 maturation stage (Figure 3C). One of three different treatments were applied 1) no heat shock  
20 (control), 2) 42°C for 2h and 3) 42°C, 2h on 3 consecutive days to determine frequencies of  
21 excision and UE recovery (Table 6). Consistent with the previous observation, *Hsp17.7<sub>pro</sub>*  
22 driving *Cre* expression under both heat treatments resulted in higher excision rates (62.5%-  
23 69.2%) resulting in higher UE rates (10 to 18) compared to *Hsp26<sub>pro</sub>* and *Drp12<sub>pro</sub>*. Based on the



1 data we identified *Hsp17.7<sub>pro</sub>* as the preferred promoter for auto-excision with heat shock of  
2 42°C for 2h.

3

#### 4 **Optimization of heat-shock conditions to improve auto-excision**

5 Further experiments were designed with *Hsp17.7<sub>pro</sub>* and *Hsp26<sub>pro</sub>* to optimize excision  
6 conditions. After three weeks of selection, somatic embryos at the maturation stage (Figure 3)  
7 were subjected to one of three different heat conditions 1) 42°C, 2h/day for 2 d, 2) 42°C for 24h,  
8 or 3) 45°C for 2h/day to determine frequencies of excision and UE. Across the treatments,  
9 transformation frequencies ranged from 35%-54.9%, except in the 42°C for 24h treatment of  
10 embryos with *Hsp17.7<sub>pro</sub>* driving *Cre* expression, which was lower (Table 7). The heat  
11 treatments increased excision rates, which varied with the conditions applied. Of the two *Hsp*  
12 promoters tested, *Hsp17.7<sub>pro</sub>* resulted in events with higher excision frequency (75% at 42°C for  
13 24h and 76.6% at 45°C for 2h) compared to *Hsp26<sub>pro</sub>* (66.7% and 61.9%). The treatment, 45°C  
14 for 2h worked best for both *Hsp* promoters.

15

#### 16 **Concurrent elimination of morphogenic and plant selectable marker genes**

17 Next, we developed a strategy that simultaneously excised both the morphogenic genes and the  
18 SMG. Two different SMGs, *HRA* and *NPTII* were tested. The construct design was slightly  
19 changed to enable excision of the SMG by including it as part of the excised DNA (morphogenic  
20 genes and *Cre*) flanked with a single pair of directly oriented *loxP* sites (Figure 4A) and the  
21 resulting excised events are free of SMG (Figure 4B). The binary construct designs with  
22 different selectable marker, morphogenic gene and a reporter gene *Zs-GREEN* is illustrated in  
23 Figure 4A. Following transformation and selection (either 0.1 mg/L imazapyr for the *HRA* gene

1 or 150mg/L G418 for the *NPTII* gene), the somatic embryos were heat-shock treated at 45°C for  
2 2h. Transformation data are presented in Table 8. Both *HRA* and *NPTII* constructs produced T0  
3 plants free of morphogenic genes and SMG in the three inbreds tested. With the *HRA* construct,  
4 lower frequencies of QEs and UEs were observed and 2-fold more null events were produced  
5 compared to the *NPTII* construct. The excision frequency was comparable in both *HRA* and  
6 *NPTII* constructs. Irrespective of the differences, both selectable markers produced high  
7 frequencies of single copy, backbone-free events which are free of the morphogenic and marker  
8 genes.

## 10 **Progeny analysis**

11 To study the inheritance and segregation of the morphogenic and SMG-free events, we screened  
12 single-copy T0 plants free of morphogenic gene and SMG produced from the *NPTII* construct.  
13 Thirteen T0 QE plants, six plants from HC69 and seven plants from PHR84Z, were selected for  
14 progeny analysis. These plants were selected and self-pollinated in the greenhouse to enable  
15 segregation analysis. Plants from all 13 events produced seeds, 100 to 200 seeds per plant. T1  
16 plants were evaluated for zygosity using qPCR to evaluate copy number of *Cre* and *NPTII* genes  
17 (excised DNA). Twelve of the 13 events showed the expected Mendelian inheritance of a single  
18 copy T-DNA integration (1:2:1; chi-square p-value>0.05) in the T1 generation (Table 9).

## 20 **DISCUSSION**

21 In maize, direct induction of somatic embryos capable of rapidly germinating from immature  
22 embryos (without a callus phase) has been demonstrated using the auxin-inducible promoter  
23 *Axig1* driving *Wus2* expression in combination with *Bbm* driven by a maize *PLTP* promoter

1 (Lowe et al., 2018). Continued expression of morphogenic genes results in abnormal phenotypes  
2 (Lowe et al., 2016). Therefore, removing morphogenic genes is imperative for accurate construct  
3 evaluation and product development and, therefore, a prerequisite for broad application of the  
4 technology. Morphogenic gene excision was accomplished using a drought-inducible *Rab17*  
5 promoter driving *Cre* recombinase expression (Villardell et al., 1991). Although this approach  
6 was used for successful excision, the requirement for a desiccation step significantly reduced  
7 stable event recovery and excision frequency (Lowe et al., 2016).

8 In order to develop a more efficient system promoters of seven developmentally  
9 regulated genes, the *Knotted-1 (Kn1)* (Bolduc et al., 2012), *Leafy cotyledon1 (Lec1)* (Pelletier et  
10 al., 2017), barley *Lipid transfer protein2 (Ltp2)* (Kalla et al., 1994), an early embryo response  
11 gene (*End2*) (Casper et al., 2005), *Globulin1 (Glb1)* (Belanger and Kriz, 1991), and *Olesin (Ole)*  
12 (Anand et al., 2017b) were evaluated for their ability to express *Cre* and excise morphogenic  
13 genes. *Glb1*, *Ole*, and *End2* promoters unlike inducible promoters did not need either physical or  
14 chemical induction for auto-excision. While morphogenic gene removal was observed using  
15 developmentally regulated promoters, this generally resulted in lower QE frequencies. A  
16 possible explanation is that premature expression caused by early unintended low-level  
17 expression from the developmentally regulated promoters resulted in low levels of *Cre*  
18 expression.

19 Developing a method for regenerating events that are free of morphogenic genes using an  
20 excision-activated marker gene system may increase excision frequency and QE recovery is  
21 described (Chu et al., 2019). In a similar manner, developmentally regulated promoters *Glb1*  
22 and *Ole* that are active during late embryo development (Kriz et al., 1990; Anand et al., 2017b),  
23 were used to drive *Cre* expression for auto-excision. This strategy resulted in the reconstitution

1 of the *HRA* marker gene, which conferred herbicide resistance (Chu et al., 2019) and would grow  
2 in the presence of selective agent. As anticipated, the strategy resulted in improved frequencies  
3 of T0 transformation and QE that resulted in approximately a 2-fold increase in UE production.  
4 Despite excision of the morphogenic genes and activation of selectable marker, a large  
5 proportion of T0 events were multi-copy and non-excised. One possible explanation is the  
6 dosage effect of the *HRA* gene on rapid maize transformation, leading to enrichment of events  
7 with stable insertions of more than one copy of the transgene. The other possibility is the  
8 restricted activation of the developmental promoters leading to partial/incomplete excision,  
9 which does not work in rapid maize transformation for enriching quality events.

10 To achieve controlled expression of recombinases genes for excision, inducible  
11 promoters have been an attractive choice. These promoters predominantly fall into two  
12 categories; 1) heat shock- or stress-inducible promoters (Kilby et al., 1995;Cuellar et al.,  
13 2006;Zhang et al., 2006;Du et al., 2019) and, 2) chemical inducible promoters (Gatz, 1996;Zuo  
14 and Chua, 2000). Expressing the recombinase under the control of promoters requiring inducers  
15 (heat, osmotic, or chemical) has allowed tighter control of gene expression, while minimizing the  
16 negative effect of ectopic gene expression. Among the stress-inducible promoters tested,  
17 *Hsp17.7<sub>pro</sub>* and *Hsp26<sub>pro</sub>* produced the best results for auto-excision based on a higher frequency  
18 of T0 transformation, gene excision and UE rate. In maize, the regulation of *Hsp* promoters in  
19 response to stresses has been described (Pegoraro et al., 2011), including accumulation of *Hsp*  
20 proteins under temperatures over 32-33°C (Ristic et al., 1991;Vierling, 1991) and enhanced  
21 *Hsp70* synthesis under drought and/or heat (Hu et al., 2010). The heat-inducible auto-excision  
22 system was previously described using a construct design that involves *Hsp70<sub>pro</sub>* driving the *Cre*  
23 recombinase for elimination of the SMG (egfp) while a second marker gene, expressing the

1 anthocyanin pigmentation (Rsc) gene, was used for event sorting (Du et al., 2019). While  
2 successful, the strategy has limited practical application requiring tracking of transgenes in the  
3 T1 generation and subsequent segregation, which is resource- and time-intensive.

4         Taking a methodological approach, a system was developed to obtain morphogenic gene-  
5 free events at high frequencies (66%-77% of the total events generated). The overall strategy was  
6 to develop an efficient auto-excision system for rapid maize transformation, with the objective of  
7 eliminating both morphogenic and marker genes, that is highly efficient to meet the needs of  
8 high throughput maize transformation. The method we developed resulted in the elimination of  
9 morphogenic and marker genes at the maturation stage of transformation at high frequencies  
10 (ranging from 60%-97%) in multiple elite inbreds. This was achieved by optimizing tissue  
11 culture conditions, optimization of heat shock treatment and identifying a versatile SMG. The  
12 stably transformed plants were normal, produced seeds and showed stable transmission of the  
13 integrated T-DNA to the next generation.

14

## 15 **MATERIALS AND METHODS**

### 16 **Plant Material**

17 Pioneer temperate maize inbreds (R03, PH2RT, PH85E and PH84Z) were used in this study. All  
18 plants used for source immature embryos were grown in the greenhouse. One of the inbred lines  
19 (R03) is nonproprietary and publicly available. The other three inbred lines described here are  
20 proprietary (PH2RT, PH85E and PH84Z). In order to protect Corteva Agriscience proprietary  
21 germplasm, such germplasm will not be made available except at the discretion of Corteva  
22 Agriscience and then only in accordance with all applicable governmental regulations.

23

## 1 **Donor material and tissue culture**

2 Seeds were germinated and grown in a greenhouse at temperature set-points of 25.5/20.0°C  
3 (day/night), and 16-h daylight. After 21 d, seedlings were transplanted into 5.9 L pots containing  
4 a soil-less substrate composed of 38% Canadian sphagnum peat, 51% composted bark, 8%  
5 perlite, and 3% vermiculite by volume and adjusted with lime to a pH of 6.0. Maize ears from  
6 the Pioneer inbred lines HC69, PH2RT, PH84Z and PH85E were collected from the greenhouse  
7 (Johnston, Iowa) at 10 to 11 d after pollination, when the immature embryos were 1.5-2.0 mm in  
8 length. Ears were sterilized with 20% Clorox (final sodium hypochlorite concentration of  
9 1.65%) for 15 min and rinsed three times with sterile distilled water.

## 10 **Culture media used for transformations and plant regeneration**

11 Briefly, maize immature embryos (1.5-2 mm) were harvested and used for *Agrobacterium*-  
12 mediated transformation, using the media, selection and regeneration methods described  
13 previously (Lowe et al., 2018;Chu et al., 2019;Hoerster et al., 2020). All media recipes are  
14 described by (Lowe et al., 2018;Chu et al., 2019;Hoerster et al., 2020). For selection, 0.1 mg/L  
15 imazapyr was supplemented to somatic embryo formation medium or 150 mg/L G418 was  
16 substituted for imazapyr.

17

## 18 ***Agrobacterium*-mediated transformation**

19 Constructs used in these experiments are illustrated in Figures 1, 2, and 4 and the individual  
20 expression components such as promoters, structural genes and terminators are listed in Table S  
21 1. The materials reported in this article contain selectable markers (*HRA* and *NPTII*) and reporter  
22 genes (*ZS-Green* and *Zs-Yellow*) are owned by third parties. Authors may not be able to provide  
23 materials including third party genetic elements to the requestor because of certain third-party

1 contractual restrictions placed on the author's institution. In such cases, the requester will be  
2 required to obtain such materials directly from the third party. The authors and authors'  
3 institution do not make any express or implied permission(s) to the requester to make, use, sell,  
4 offer for sale, or import third party proprietary materials.

5  
6 All transformations were done using the thymidine auxotrophic *Agrobacterium*  
7 *tumefaciens* strain LBA4404 THY- containing pVIR9 (Anand et al., 2018) at OD<sub>550</sub> of 0.5. The  
8 conditions for *Agrobacterium* suspension culture preparation following embryo isolation and  
9 infection has been previously described (Lowe et al., 2018;Hoerster et al., 2020). Two selectable  
10 markers were used in experiments: *HRA* (Green et al., 2009), a sulfonyleurea herbicide resistance  
11 marker, driven by the sorghum *Als* promoter for selection with 0.1 mg/L imazapyr in culture  
12 medium, or the *Ubi<sub>pro</sub>::NPTII* gene for selection with 150 mg/L G418 in culture medium.

#### 14 **Excision conditions**

15 For the developmentally regulated *pro::Cre* testing, no optimization was required. These  
16 experiments were performed on two inbreds, HC69 and PHR2HT. The initial heat shock  
17 treatment for excision involved three different conditions: no heat shock (control), heat shock at  
18 37°C for 1 day, or 42°C for 2h/day for 3 consecutive days, were tested. We further optimized the  
19 heat shock condition testing three additional heat treatments 1) 42°C, 2h/day for 2 d, 2) 42°C for  
20 24h, or 3) 45°C for 2h/day to identify a treatment that is best and simple for implementation.

#### 22 **Molecular analyses**

1 All molecular analysis and transgene copy number determination methods were previously  
2 described (Wu et al., 2014;Lowe et al., 2016;Hoerster et al., 2020). qPCR data was used to  
3 confirm recombinase-mediated excision based on the absence the transgenes flanked by the *loxP*  
4 sites, determine the copy number of structural genes outside the excision DNA, and to screen for  
5 the presence of *Agrobacterium* binary construct backbone integration. Genomic DNA samples  
6 were extracted from a single piece (200 ng) of fresh leaf tissue from each plant (Truett et al.,  
7 2000). Non-transgenic maize inbred lines were used as the negative controls. Quantification  
8 was based on detection of amplified gene sequences using gene-specific forward and reverse  
9 primers, along with the corresponding gene-specific FAM<sup>TM</sup> or Vic<sup>®</sup>-based MGB fluorogenic  
10 probes (Applied Biosystems). The 2- $\Delta\Delta$ CT method (Livak and Schmittgen, 2001) was used to  
11 estimate copy number. Events which are single copy for all the transgenes and excised was used  
12 to calculate the excision frequency. The events which are excised with a single copy (SC) of all  
13 the transgenes without vector backbone integration were defined as a quality event (QE). The  
14 usable event (UE) frequency was calculated as transformation frequency times QE frequency.  
15 Data collected from different experiments were analyzed separately by analysis of variance  
16 (ANOVA), with mean separation by LSD (P=0.05) using JMP Pro 12.2.0 Statistical Discovery  
17 software package (SAS Institute Inc., Cary, NC).

18

## 19 **CONCLUSION**

20 Despite the recent progress in developing a rapid maize transformation, the presence of  
21 morphogenic genes in the transgenic event have shown to result in pleiotropic phenotypes and is  
22 not recommended for transgene testing or commercial product development. The first generation  
23 of rapid maize transformation method was designed to improve the transformation rates and to



1 extend transformation capabilities to many genotypes. Subsequently, we demonstrated a viable  
2 second-generation alternative, using a mixture of an *Agrobacterium* strains, one with non-  
3 integrating *Wus2* gene and the other with a combination of structural genes to regenerate  
4 transgenic plants free of morphogenic genes. Even though this simplifies vector construction,  
5 however, the process still relies on SMG for recovery of stable transgenic events. This study  
6 demonstrated a viable third alternative, relying on inducible promoters for auto-excision of both  
7 the morphogenic genes and the SMG in the early stages of maize transformation. The stable  
8 transformed plants recovered by this method are free of the morphogenic genes and marker  
9 genes, a desirable quality for transgene evaluation and in commercial products.

10

#### 11 **AUTHOR CONTRIBUTION STATEMENT**

12 A.A., E.W., L.K., W.G-K., T.J., and N.D.A conceived the research idea, A.A., E.W., L.K., and  
13 W.G-K. designed constructs and research, and N.W., MA., HG. and R.L conducted maize  
14 transformation and optimization; E.W. and A.A, performed data analysis; A.A., W.G-K . T.J.,  
15 and N.D.C. wrote the manuscript.

16

#### 17 **CONFLICT OF INTEREST**

18 NW, MA, HG, RL, EW, LK, W.G-K and AA are inventors on pending applications on this work  
19 and a related work are current employees of Corteva Agriscience who owns the pending patent  
20 applications. TJ and NDC are current employees of Corteva Agriscience.

21

#### 22 **ACKNOWLEDGMENTS**

1 We thank the internal support groups, Super-Vector (SV) team for their support with vector  
2 construction and PCR Analysis and Characterization (PAC) team for molecular event quality  
3 analysis. Scott Betts with program support, Terry Hu for maize transformation support. Special  
4 thanks to Tracy Fisher and Scott Betts for critical reading of the manuscript and Kara Califf for  
5 the art work.

## 1   **References**

- 2   An, G. (1986). Development of plant promoter expression vectors and their use for analysis of  
3       differential activity of nopaline synthase promoter in transformed tobacco cells. *Plant*  
4       *Physiol.* 81, 86-91.
- 5   An, G., Mitra, A., Choi, H.K., Costa, M.A., An, K., Thornburg, R.W., and Ryan, C.A. (1989).  
6       Functional analysis of the 3' control region of the potato wound-inducible proteinase  
7       inhibitor II gene. *The Plant Cell* 1, 115-122.
- 8   Anand, A., Arling, M.L., Da Silva Conceicao, A., Gordon-Kamm, W.J., Hastings, C.E.,  
9       Hoerster, G.M. et al, (2017a). Methods and compositions for rapid plant transformation.  
10      United States patent US20170121722A1
- 11   Anand, A., Bass, S.H., Bertain, S.M., Cho, H.J., Kinney, A.J., Klein, T.M., et al. (2017b).  
12      Ochrobactrum-mediated transformation of plants. International patent  
13      WO2017040343A1
- 14   Anand, A., Bass, S.H., Wu, E., Wang, N., McBride, K.E., Annaluru, N., Miller, M., Hua, M., and  
15      Jones, T.J. (2018). An improved ternary vector system for *Agrobacterium*-mediated rapid  
16      maize transformation. *Plant Mol Biol* 97, 187-200.
- 17   Araki, H., Jearnpipatkul, A., Tatsumi, H., Sakurai, T., Ushio, K., Muta, T., and Oshima, Y.  
18      (1985). Molecular and functional organization of yeast plasmid pSR1. *J. Mol. Biol.* 182,  
19      191-203.
- 20   Bayley, C.C., Morgan, M., Dale, E.C., and Ow, D.W. (1992). Exchange of gene activity in  
21      transgenic plants catalyzed by the Cre-lox site-specific recombination system. *Plant Mol.*  
22      *Biol.* 18, 353-361.
- 23   Belanger, F.C., and Kriz, A.L. (1991). Molecular basis for allelic polymorphism of the maize  
24      Globulin-1 gene. *Genetics* 129, 863-872.
- 25   Bhyri, P., Khrishnamurthy, N., Narayanan, E., Nott, A., and Sarangi, R. (2014). Novel plant  
26      terminator sequences. United States patent US20140130205.
- 27   Bolduc, N., Yilmaz, A., Mejia-Guerra, M.K., Morohashi, K., O'connor, D., Grotewold, E., and  
28      Hake, S. (2012). Unraveling the KNOTTED1 regulatory network in maize meristems.  
29      *Genes Dev.* 26, 1685-1690.
- 30   Busk, P.K., Jensen, A.B., and Pagès, M. (1997). Regulatory elements in vivo in the promoter of  
31      the abscisic acid responsive gene *rab17* from maize. *Plant J.* 11, 1285-1295.
- 32   Casper, L., Lappégard, K.K., Abbitt, S.E., Martino-Catt, S.J., and Olsen, O.A. (2005). Seed-  
33      preferred promoters from end genes. United States patent US6903205B2.
- 34   Chilcoat, D., Liu, Z.-B., and Sander, J. (2017). "Chapter Two - Use of CRISPR/Cas9 for Crop  
35      Improvement in Maize and Soybean," in *Progress in Molecular Biology and*  
36      *Translational Science*, eds. D.P. Weeks & B. Yang. Academic Press), 27-46.
- 37   Chong-Pérez, B., and Angenon, G. (2013). "Strategies for generating marker-free transgenic  
38      plants" in *Genetic Engineering*, ed. I. Sithole-Niang. Intech Open.
- 39   Christensen, A.H., Sharrock, R.A., and Quail, P.H. (1992). Maize polyubiquitin genes: structure,  
40      thermal perturbation of expression and transcript splicing, and promoter activity  
41      following transfer to protoplasts by electroporation. *Plant Mol Biol.* 18, 675-689.
- 42   Chu, U.C., Adelberg, J., Lowe, K., and Jones, T.J. (2019). Use of DoE methodology to optimize  
43      the regeneration of high-quality, single-copy transgenic *Zea mays* L. (maize) plants. *In*  
44      *Vitro Cell. Dev. Biol. Plant* 55, 678-694

- 1 Cox, M.M. (1983). The FLP protein of the yeast 2-microns plasmid: expression of a eukaryotic  
2 genetic recombination system in *Escherichia coli*. *Proc. Natl. Acad. Sci. U.S.A* 80, 4223-  
3 4227.
- 4 Cuellar, W., Gaudin, A., Solórzano, D., Casas, A., Ñopo, L., Chudalayandi, P., Medrano, et al.  
5 (2006). Self-excision of the antibiotic resistance gene *nptII* using a heat inducible Cre-  
6 loxP system from transgenic potato. *Plant Mol. Biol.* 62, 71-82.
- 7 Dale, E.C., and Ow, D.W. (1991). Gene transfer with subsequent removal of the selection gene  
8 from the host genome. *Proc. Natl. Acad. Sci. U.S.A* 88, 10558-10562.
- 9 Darbani, B., Eimanifar, A., Stewart Jr., C.N., and Camargo, W.N. (2007). Methods to produce  
10 marker-free transgenic plants. *Biotechnol. J.* 2, 83-90.
- 11 Du, D., Jin, R., Guo, J., and Zhang, F. (2019). Construction of marker-free genetically modified  
12 maize using a heat-inducible auto-excision vector. *Genes* 10, 374.
- 13 Gao, X., Zhou, J., Li, J., Zou, X., Zhao, J., Li, Q., et. al. (2015). Efficient generation of marker-  
14 free transgenic rice plants using an improved transposon-mediated transgene  
15 reintegration strategy. *Plant Physiol.* 167, 11-24.
- 16 Garnaat, C., Lowe, K., S., and Roth, B., A (2002). *Zm-AXIG1*-specific polynucleotides and  
17 methods of use. United States patent application US2001022169
- 18 Gatz, C. (1996). Chemically inducible promoters in transgenic plants. *Curr. Opin Biotechnol.* 7,  
19 168-172..
- 20 Gleave, A.P., Mitra, D.S., Mudge, S.R., and Morris, B.a.M. (1999). Selectable marker-free  
21 transgenic plants without sexual crossing: transient expression of cre recombinase and  
22 use of a conditional lethal dominant gene. *Plant Mol. Biol.* 40, 223-235.
- 23 Gordon-Kamm, W.J., Helentjaris, T., Lowe, K., Shen, B., Tarczynski, M., and Zheng, P. (2005).  
24 Ap2 domain transcription factor *Odp2* (ovule development protein 2) and methods of use.  
25 International patent WO2005075655A2
- 26 Green, J.M., Hale, T., Pagano, M.A., Andreassi, J.L., and Gutteridge, S.A. (2009). Response of  
27 98140 corn with *Gat4621* and *HRA* transgenes to glyphosate and ALS-inhibiting  
28 herbicides. *Weed Sci.* 57, 142-148.
- 29 Hare, P.D., and Chua, N.H. (2002). Excision of selectable marker genes from transgenic plants.  
30 *Nat. Biotechnol.* 20, 575-580.
- 31 Hershey, H.P., and Stoner, T.D. (1991). Isolation and characterization of cDNA clones for RNA  
32 species induced by substituted benzenesulfonamides in corn. *Plant Mol. Biol.* 17, 679-  
33 690.
- 34 Hoerster, G., Wang, N., Ryan, L., Wu, E., Anand, A., McBride, K., et al. (2020). Use of non-  
35 integrating *Zm-Wus2* vectors to enhance maize transformation. *In Vitro Cell. Dev. Biol.*  
36 *Plant.* 10.1007/s11627-019-10042-2
- 37 Hoess, R.H., and Abremski, K. (1985). Mechanism of strand cleavage and exchange in the Cre-  
38 lox site-specific recombination system. *J. Mol. Biol.* 181, 351-362.
- 39 Hoess, R.H., Ziese, M., and Sternberg, N. (1982). P1 site-specific recombination: nucleotide  
40 sequence of the recombining sites. *Proc. Natl. Acad. Sci. U.S.A* 79, 3398-3402.
- 41 Hu, X., Liu, R., Li, Y., Wang, W., Tai, F., Xue, R., and Li, C. (2010). Heat shock protein 70  
42 regulates the abscisic acid-induced antioxidant response of maize to combined drought  
43 and heat stress. *Plant Growth Regul.* 60, 225-235.
- 44 Jia, H., Pang, Y., Chen, X., and Fang, R. (2006). Removal of the selectable marker gene from  
45 transgenic tobacco plants by expression of cre recombinase from a tobacco mosaic virus  
46 vector through agroinfection. *Transgenic. Res.* 15, 375-384.

- 1 Kalla, R., Shimamoto, K., Potter, R., Nielsen, P.S., Linnestad, C., and Olsen, O.-A. (1994). The  
2 promoter of the barley aleurone-specific gene encoding a putative 7 kDa lipid transfer  
3 protein confers aleurone cell-specific expression in transgenic rice. *Plant J.* 6, 849-860.
- 4 Kerbach, S., Lörz, H., and Becker, D. (2005). Site-specific recombination in *Zea mays*. *Theor.*  
5 *Appl. Genet.* 111, 1608-1616.
- 6 Kilby, N.J., Davies, G.J., Snaith, M.R., and Murray, J.A.H. (1995). FLP recombinase in  
7 transgenic plants: constitutive activity in stably transformed tobacco and generation of  
8 marked cell clones in *Arabidopsis*. *Plant J.* 8, 637-652.
- 9 Klippel, A., Mertens, G., Patschinsky, T., and Kahmann, R. (1988). The DNA invertase Gin of  
10 phage Mu: formation of a covalent complex with DNA via a phosphoserine at amino acid  
11 position 9. *EMBO J.* 7, 1229-1237.
- 12 Kopertekh, L., Jüttner, G., and Schiemann, J. (2004). PVX-Cre-mediated marker gene  
13 elimination from transgenic plants. *Plant Mol. Biol.* 55, 491-500.
- 14 Kopertekh, L., and Schiemann, J. (2005). Agroinfiltration as a tool for transient expression of cre  
15 recombinase in vivo. *Transgenic Res.* 14, 793-798.
- 16 Kriz, A.R., Wallace, M.S., and Paiva, R. (1990). Globulin gene expression in embryos of maize  
17 viviparous mutants. *Plant Physiol.* 92, 538-542.
- 18 Ling, F., Zhou, F., Chen, H., and Lin, Y. (2016). Development of marker-free insect-resistant  
19 indica rice by *Agrobacterium tumefaciens*-mediated co-transformation. *Front. Plant Sci.*  
20 7 (448).
- 21 Liu, S., Kriz, A., Duncan, D., and Widholm, J. (1998). Abscisic acid-regulated Glb1 transient  
22 expression in cultured maize P3377 cells. *Plant Cell Rep.* 17, 650-655.
- 23 Livak, K.J., and Schmittgen, T.D. (2001). Analysis of relative gene expression data using real-  
24 time quantitative pcr and the  $2^{-\Delta\Delta CT}$  method. *Methods* 25, 402-408.
- 25 Lowe, K., La Rota, M., Hoerster, G., Hastings, C., Wang, N., Chamberlin, M., et al. (2018).  
26 Rapid genotype "independent" *Zea mays* L. (maize) transformation via direct somatic  
27 embryogenesis. *In Vitro Cell. Dev. Biol. Plant* 54, 240-252.
- 28 Lowe, K., Wu, E., Wang, N., Hoerster, G., Hastings, C., Cho, M.-J., et al (2016). Morphogenic  
29 regulators baby boom and wuschel improve monocot transformation. *Plant Cell* 28,  
30 1998-2015.
- 31 Lowe, K.S., Cahoon, R.E., Scelonge, C.J., Tao, Y., Gordon-Kamm, W.J., Bruce, W.B., and  
32 Newman, L.J. (2007). Wuschel (WUS) gene homologs. United States patent US  
33 20077256322B2
- 34 Maeser, S., and Kahmann, R. (1991). The Gin recombinase of phage Mu can catalyse site-  
35 specific recombination in plant protoplasts. *Mol. Gen. Genet.* 230, 170-176.
- 36 Maher, M.F., Nasti, R.A., Vollbrecht, M., Starker, C.G., Clark, M.D., and Voytas, D.F. (2020).  
37 Plant gene editing through de novo induction of meristems. *Nat. Biotechnol.* 38, 84-89.
- 38 Matz, M.V., Fradkov, A.F., Labas, Y.A., Savitsky, A.P., Zaraisky, A.G., Markelov, M.L., and  
39 Lukyanov, S.A. (1999). Fluorescent proteins from nonbioluminescent Anthozoa species.  
40 *Nat. Biotechnol.* 17, 969-973.
- 41 Mookkan, M., Nelson-Vasilchik, K., Hague, J., Zhang, Z.J., and Kausch, A.P. (2017). Selectable  
42 marker independent transformation of recalcitrant maize inbred B73 and sorghum  
43 P898012 mediated by morphogenic regulators BABY BOOM and WUSCHEL2. *Plant*  
44 *Cell Rep.* 36, 1477-1491.

- 1 Moravčíková, J., Vaculková, E., Bauer, M., and Libantová, J. (2008). Feasibility of the seed  
2 specific cruciferin C promoter in the self excision Cre/loxP strategy focused on  
3 generation of marker-free transgenic plants. *Theor. Appl. Genet.* 117, 1325.
- 4 Odell, J., Caimi, P., Sauer, B., and Russell, S. (1990). Site-directed recombination in the genome  
5 of transgenic tobacco. *Mol. Gen. Genet.* 223, 369-378.
- 6 Pegoraro, C., Mertz, L.M., Da Maia, L.C., Rombaldi, C.V., and De Oliveira, A.C. (2011).  
7 Importance of heat shock proteins in maize. *J.Crop Sci Biotechnol.* 14, 85-95.
- 8 Pelletier, J.M., Kwong, R.W., Park, S., Le, B.H., Baden, R., Cagliari, A., et al. (2017). LEC1  
9 sequentially regulates the transcription of genes involved in diverse developmental  
10 processes during seed development. *Proc. Natl. Acad. Sci. U.S.A* 114, E6710-E6719.
- 11 Puchta, H. (2000). Removing selectable marker genes: taking the shortcut. *Trends Plant Sci.* 5,  
12 273-274.
- 13 Puchta, H. (2003). Marker-free transgenic plants. *Plant Cell Tissue Organ Cult.* 74, 123-134.
- 14 Ristic, Z., Gifford, D.J., and Cass, D.D. (1991). Heat shock proteins in two lines of *Zea mays* L.  
15 that differ in drought and heat resistance. *Plant Physiol.* 97, 1430-1434.
- 16 Senecoff, J.F., Bruckner, R.C., and Cox, M.M. (1985). The FLP recombinase of the yeast 2-  
17 micron plasmid: characterization of its recombination site. *Proc. Natl. Acad. Sci. U.S.A*  
18 82, 7270-7274.
- 19 Shane, E.A. (2007). Early endosperm promoter EEP1. United States patent US 780399 B2.
- 20 Truett, G.E., Heeger, P., Mynatt, R.L., Truett, A.A., Walker, J.A., and Warman, M.L. (2000).  
21 Preparation of PCR-quality mouse genomic dna with hot sodium hydroxide and tris  
22 (HotSHOT). *BioTechniques* 29, 52-54.
- 23 Verweire, D., Verleyen, K., De Buck, S., Claeys, M., and Angenon, G. (2007). Marker-free  
24 transgenic plants through genetically programmed auto-excision. *Plant Physiol.* 145,  
25 1220-1231.
- 26 Vierling, E. (1991). The roles of heat shock proteins in plants. *Annu. Rev. Plant Physiol. Plant*  
27 *Mol. Biol.* 42, 579-620.
- 28 Vilardeell, J., Mundy, J., Stilling, B., Leroux, B., Pla, M., Freyssinet, G., and Pagès, M. (1991).  
29 Regulation of the maize rab17 gene promoter in transgenic heterologous systems. *Plant*  
30 *Mol Biol* 17, 985-993.
- 31 Wu, E., Lenderts, B., Glassman, K., Berezowska-Kaniewska, M., Christensen, H., Asmus, T., et  
32 al. (2014). Optimized *Agrobacterium*-mediated sorghum transformation protocol and  
33 molecular data of transgenic sorghum plants. *In Vitro Cell. Dev. Biol. Plant* 50, 9-18.
- 34 Yau, Y.Y., and Stewart, C.N., Jr. (2013). Less is more: strategies to remove marker genes from  
35 transgenic plants. *BMC Biotechnol.* 13, 36-36.
- 36 Zhang, Y., Li, H., Ouyang, B., Lu, Y., and Ye, Z. (2006). Chemical-induced autoexcision of  
37 selectable markers in elite tomato plants transformed with a gene conferring resistance to  
38 lepidopteran insects. *Biotechnol. Lett.* 28, 1247-1253.
- 39 Zubko, E., Scutt, C., and Meyer, P. (2000). Intrachromosomal recombination between attP  
40 regions as a tool to remove selectable marker genes from tobacco transgenes. *Nat.*  
41 *Biotechnol.* 18, 442-445.
- 42 Zuo, J., and Chua, N.-H. (2000). Chemical-inducible systems for regulated expression of plant  
43 genes. *Curr. Opin. Biotech.* 11, 146-151.

44

45



1 Table 1. List of the promoters, their source, and their expression pattern in plants.

| Promoters                | Source                           | Expression           | Reference                                                          |
|--------------------------|----------------------------------|----------------------|--------------------------------------------------------------------|
| <i>Kn1</i>               | Maize                            | Apical Meristem      | Gen bank AY312169                                                  |
| <i>Lec1</i>              | Maize                            | Early Embryo         | (Shane, 2007)                                                      |
| <i>End2</i>              | Maize                            | Early Embryo         | (Casper et al., 2005)                                              |
| <i>Ltp2</i>              | Maize                            | Early Embryo         | (Kalla et al., 1994)                                               |
| <i>Glb1</i>              | Maize                            | Late Embryo          | (Liu et al., 1998)                                                 |
| <i>Ole</i>               | Maize                            | Late Embryo          | (Anand et al., 2017b)                                              |
| <i>Rab17</i>             | Maize                            | Late Embryo/Stress   | (Busk et al., 1997)                                                |
| <i>Nos</i>               | <i>Agrobacterium tumefaciens</i> | Constitutive         | (An, 1986)                                                         |
| <i>Ubi<sub>pro</sub></i> | Maize                            | Constitutive         | (Christensen et al., 1992)                                         |
| <i>Hsp17.7</i>           | Maize                            | Heat shock inducible | (Anand et al., 2017a)                                              |
| <i>Hsp26</i>             | Maize                            | Heat shock inducible | (Anand et al., 2017a)                                              |
| <i>Rab21</i>             | <i>Seteria itallica</i>          | Drought inducible    | Previously unpublished Corteva Agriscience sequence Si026926m      |
| <i>Drp12</i>             | <i>Brachypodium distachyon</i>   | Drought inducible    | Previously unpublished Corteva Agriscience sequence Bradi3g43870.1 |
| <i>Drp1</i>              | <i>Brachypodium distachyon</i>   | Drought inducible    | Previously unpublished Corteva Agriscience sequence Bradi1g37410.1 |

2

1 Table 2. Transformation results with different developmentally regulated promoters driving *Cre* expression for auto-excision of  
 2 morphogenic genes using construct design described in Figure 1. Data presents the T0 transformation frequency, qPCR detection of  
 3 the number of excised events and the quality event frequency in two different inbreds, PH2RT and HC69.  
 4

| Inbred | Promoter     | Embryos transformed | T0 plants | T0 transformation frequency (% $\pm$ SE) | Excised single copy, backbone-free events | Excision frequency (%) | Quality event (%) | Usable events (%) |
|--------|--------------|---------------------|-----------|------------------------------------------|-------------------------------------------|------------------------|-------------------|-------------------|
| PH2RT  | <i>Ltp2</i>  | 229                 | 75        | 32.8 (2.2) <sup>a</sup>                  | 10                                        | 50                     | 13.3              | 4.4               |
|        | <i>Ole</i>   | 228                 | 59        | 27.2 (3.3) <sup>ab</sup>                 | 8                                         | 40                     | 13.6              | 3.5               |
|        | <i>Glb1</i>  | 280                 | 38        | 13.6 (1.4) <sup>c</sup>                  | 7                                         | 58.5                   | 18.4              | 2.5               |
|        | <i>End2</i>  | 174                 | 39        | 22.4 (2.6) <sup>b</sup>                  | 3                                         | 100                    | 7.7               | 1.7               |
|        | <i>Ubi</i>   | 440                 | 40        | 9.1 (1.9) <sup>c</sup>                   | 12                                        | 59.1                   | 30.0              | 2.7               |
| HC69   | <i>Rab17</i> | 121                 | 35        | 28.9 (2.6) <sup>b</sup>                  | 1                                         | 25                     | 2.9               | 0.8               |
|        | <i>Ole</i>   | 151                 | 49        | 37.1 (2.1) <sup>a</sup>                  | 3                                         | 37.5                   | 6.1               | 2.0               |
|        | <i>Glb1</i>  | 230                 | 58        | 25.2 (1.8) <sup>b</sup>                  | 5                                         | 38.5                   | 8.6               | 2.2               |
|        | <i>End2</i>  | 178                 | 48        | 27.0 (2.4) <sup>b</sup>                  | 1                                         | 100                    | 2.1               | 0.6               |
|        | <i>Ubi</i>   | 202                 | 37        | 18.3 (1.2) <sup>c</sup>                  | 3                                         | 13.6                   | 8.1               | 1.5               |

5  
 6 Data from three independent transformers was used to determine T0 transformation frequency. The quality events (QE) were identified as single copy, backbone-  
 7 free, and morphogenic gene-free (excised). The excision frequency was determined as the ratio of the number of excised single-copy events relative to the total  
 8 single-copy events. The number QEs was divided by the total number of events recovered to calculate the QE frequency. The usable event (UE) frequency is a  
 9 measure of the number of acceptable transgenic events per 100 embryos that was determined as the product of QE frequency and T0 transformation frequency.  
 10 Mean values followed by the same letter are not statistically different from each other at the significance level of 0.05.



1 Table 3. Transformation results from excision-activated marker gene selection using either the *Glb1<sub>pro</sub>* or the *Ole<sub>pro</sub>* driving *Cre*  
 2 expression using construct design described in Figure 2. Data presents the T0 transformation frequency, qPCR detection of the number  
 3 of excised events and the quality event frequency in maize inbred HC69.

| Promoter    | Embryos transformed | T0 plants | T0 transformation frequency (% ±SE) | Total single copy events | Excised single copy, backbone-free events | Excision frequency (%) | Quality event (%) | Usable events (%) |
|-------------|---------------------|-----------|-------------------------------------|--------------------------|-------------------------------------------|------------------------|-------------------|-------------------|
| <i>Glb1</i> | 126                 | 57        | 44.7 (2.8) <sup>a</sup>             | 19                       | 13                                        | 68.4                   | 13.3              | 5.6               |
| <i>Ole</i>  | 112                 | 45        | 40.2 (1.9) <sup>a</sup>             | 15                       | 8                                         | 53.3                   | 8.8               | 3.6               |

4  
 5 Data from two independent transformers was used to determine T0 transformation frequency. Quality events (QE) were identified as single copy, backbone-free,  
 6 and morphogenic gene-free (excised). The excision frequency was determined as the ratio of the number of excised single-copy events relative to the total single-  
 7 copy events. The number QEs was divided by the total number of events recovered to calculate the QE frequency. The usable event (UE) frequency is a  
 8 measure of the number of acceptable transgenic events per 100 embryos that was determined as the product of QE frequency and transformation frequency.  
 9 Mean values followed by the same letter are not statistically different from each other at the significance level of 0.05.

1 Table 4. Transformation results from excision-activated marker gene selection using *Glb<sub>pro</sub>* driving *Cre* expression using construct  
 2 design described in Figure 2. Data presents the T0 transformation frequency, qPCR detection of the number of excised events and the  
 3 quality event frequency in three maize inbreds (HC69, PH85E, and PH84Z).

| Inbred | Embryos transformed | T0 plants | T0 transformation (% ±SE) | Excised single copy, backbone-free events | Excision frequency (%) | Quality event (%) | Usable events (%) |
|--------|---------------------|-----------|---------------------------|-------------------------------------------|------------------------|-------------------|-------------------|
| HC69   | 393                 | 196       | 49.9 (3.9) <sup>a</sup>   | 17                                        | 55.0                   | 8.7               | 4.3               |
| PH85E  | 363                 | 47        | 12.9 (1.3) <sup>c</sup>   | 13                                        | 59.0                   | 27.7              | 3.6               |
| PH84Z  | 367                 | 105       | 28.6 (2.5) <sup>b</sup>   | 7                                         | 61.0                   | 6.7               | 1.9               |

4  
 5 Data from two independent transformers was used to determine T0 transformation frequency. The quality events (QE) were identified as single copy, backbone-  
 6 free, and morphogenic gene-free (excised). The excision frequency was determined as the ratio of the number of excised single-copy events relative to the total  
 7 single-copy events. The number QEs was divided by the total number of events recovered to calculate the QE frequency. The usable event (UE) frequency is a  
 8 measure of the number of acceptable transgenic events per 100 embryos that was determined as the product of QE frequency and transformation frequency.  
 9 Mean values followed by the same letter are not statistically different from each other at the significance level of 0.05.

10

1 Table 5. Transformation results from screening of six different inducible promoters driving *Cre* expression for controlled gene  
 2 excision. For this study, three different conditions were evaluated: two heat shock treatments (37°C for 1 day and 42°C, 2h/day for 3  
 3 consecutive days) and no heat (control). Data presents the qPCR detection of the number of excised events and excision frequency  
 4 across the different promoters, and a control construct without the *Cre* gene, in maize inbred HC69.

5

| Promoter                 | Control |        |    |                              | 37°C, 1 day |        |    |                              | 42°C, 2h/day for 3 days |        |    |                              |
|--------------------------|---------|--------|----|------------------------------|-------------|--------|----|------------------------------|-------------------------|--------|----|------------------------------|
|                          | Embryos | T0     |    | Excision<br>frequency<br>(%) | Embryos     | T0     |    | Excision<br>frequency<br>(%) | Embryos                 | T0     |    | Excision<br>frequency<br>(%) |
|                          |         | plants | QE |                              |             | plants | QE |                              |                         | plants | QE |                              |
| <i>Hsp17.7</i>           | 455     | 59     | 5  | 27.8                         | 50          | 6      | 2  | 66.7                         | 50                      | 20     | 4  | 100                          |
| <i>Hsp26</i>             | 450     | 98     | 0  | 0.0                          | 50          | 5      | 0  | 0                            | 50                      | 21     | 3  | 43                           |
| <i>Rab17</i>             | 455     | 127    | 1  | 3.4                          | 50          | 10     | 0  | 0                            | 50                      | 18     | 0  | 0                            |
| <i>Rab21</i>             | 455     | 101    | 8  | 36.4                         | 50          | 13     | 1  | 100                          | 50                      | 20     | 0  | 0                            |
| <i>Drp12</i>             | 450     | 79     | 2  | 11.1                         | 50          | 16     | 0  | 0                            | 50                      | 22     | 2  | 66.7                         |
| <i>Drp1</i>              | 438     | 90     | 8  | 27.6                         | 50          | 8      | 0  | 0                            | 50                      | 27     | 5  | 45.5                         |
| Control (no <i>Cre</i> ) | 450     | 182    | 0  |                              |             |        |    |                              |                         |        |    |                              |

6

7 Data from two independent transformers was used to determine T0 transformation frequency. The quality events (QE) were identified as single copy, backbone-  
 8 free, and morphogenic gene-free (excised). The excision frequency was determined as the ratio of the number of excised single-copy events relative to the total  
 9 single-copy events.

1 Table 6. Transformation results optimizing the heat shock conditions for controlled gene excision using three inducible promoters  
 2 driving *Cre* expression. The three different conditions evaluated were: no heat (control) and two heat shock treatments (42°C for 2h  
 3 and 42°C, 2h/day for 3 consecutive days). The data presents the qPCR detection of the number of excised events and excision  
 4 frequency across the different promoters in the study as compared to a control construct without the *Cre* gene in maize inbred HC69.

| Promoter       | Control |              |    |                              |         | 42°C, 2h |              |    |                              |           | 42°C, 2h/day for 3 days |              |    |                              |           |
|----------------|---------|--------------|----|------------------------------|---------|----------|--------------|----|------------------------------|-----------|-------------------------|--------------|----|------------------------------|-----------|
|                | Embryos | T0<br>Plants | QE | Excision<br>frequency<br>(%) | UE<br>% | Embryos  | T0<br>plants | QE | Excision<br>frequency<br>(%) | UE<br>(%) | Embryos                 | T0<br>plants | QE | Excision<br>frequency<br>(%) | UE<br>(%) |
| <i>Hsp17.7</i> | 50      | 18           | 1  | 12.5                         | 2       | 50       | 17           | 5  | 62.5                         | 10        | 50                      | 15           | 9  | 69.2                         | 18.0      |
| <i>Hsp26</i>   | 50      | 18           | 0  | 0                            | 0       | 50       | 21           | 2  | 42.2                         | 4.0       | 50                      | 9            | 2  | 66.7                         | 4.0       |
| <i>Drp12</i>   | 50      | 11           | 1  | 25                           | 2       | 50       | 9            | 1  | 50.0                         | 2.0       | 50                      | 14           | 1  | 20.0                         | 2.0       |

5  
 6 Data from two independent transformers was used to determine T0 transformation frequency. The quality events (QE) were identified as single copy, backbone-  
 7 free, and morphogenic gene-free (excised). The excision frequency was determined as the ratio of the number of excised single-copy events relative to the total  
 8 single-copy events. The number QEs was divided by the total number of events recovered to calculate the QE frequency. The usable event (UE) frequency is a  
 9 measure of the number of acceptable transgenic events per 100 embryos that was determined as the product of QE frequency and transformation frequency.  
 10 Mean values followed by the same letter are not statistically different from each other at the significance level of 0.05

1 Table 7. Optimizing heat shock conditions for controlled gene excision using heat shock promoters *Hsp17.7* and *Hsp26* driving *Cre*  
 2 expression as shown in Figure 5. Four different conditions were evaluated side-by-side using split ears including no heat (control) and  
 3 three heat shock treatments (42°C, 2h/d for 2d; 42°C/24h; and 45°C/2h). Transformation results and qPCR detection of the number of  
 4 excised quality events, frequencies of excision and usable event are presented.

| Promoter       | Treatments     | Embryos transformed | T0 plants | T0 transformation (% ±SE) | Quality events | Excision frequency (%) | Usable event (%) |
|----------------|----------------|---------------------|-----------|---------------------------|----------------|------------------------|------------------|
| <i>Hsp17.7</i> | none           | 102                 | 56        | 54.9 (4.4) <sup>a</sup>   | 6              | 33.3                   | 5.9              |
|                | 42°C, 2h/d, 2d | 102                 | 39        | 38.2 (2.1) <sup>b</sup>   | 9              | 56.3                   | 8.8              |
|                | 42°C/24h       | 102                 | 16        | 15.7 (1.8) <sup>c</sup>   | 6              | 75.0                   | 5.9              |
|                | 45°C/2h        | 102                 | 50        | 49.0 (3.2) <sup>a</sup>   | 14             | 76.6                   | 13.7             |
| <i>Hsp26</i>   | none           | 100                 | 53        | 53.0 (4.0) <sup>a</sup>   | 1              | 5.6                    | 1.0              |
|                | 42°C, 2h/d, 2d | 100                 | 35        | 35.0 (1.2) <sup>b</sup>   | 12             | 66.7                   | 12.0             |
|                | 42°C/ 24h      | 100                 | 41        | 41.0 (2.2) <sup>b</sup>   | 10             | 66.7                   | 10.0             |
|                | 45°C/2h        | 100                 | 50        | 50.0 (2.3) <sup>a</sup>   | 13             | 61.9                   | 13.0             |

5 Data from two independent transformers was used to determine T0 transformation frequency. The quality events (QE) were identified as single copy, backbone-  
 6 free, and morphogenic gene-free (excised). The excision frequency was determined as the ratio of the number of excised single-copy events relative to the total  
 7 single-copy events. The number QEs was divided by the total number of events recovered to calculate the QE frequency. The usable event (UE) frequency is a  
 8 measure of the number of acceptable transgenic events per 100 embryos that was determined as the product of QE frequency and transformation frequency.  
 9 Mean values followed by the same letter are not statistically different from each other at the significance level of 0.05.

10

1 Table 8. Transformation results and molecular event data using the *Hsp17.7* heat shock promoter for controlled excision of both  
 2 morphogenic gene and marker gene in three maize inbreds (HC69, PH85E, and PH84Z). Two different SMGs were evaluated, *HRA*  
 3 (resistance to the sulfonyleurea herbicide ethametsulfuron) and *NPTII* (resistance to antibiotic G418), using the same construct design  
 4 with the same set of morphogenic genes as shown in Figure 5. Transformation results and qPCR detection of the number of excised  
 5 quality events, frequencies of excision and usable event are presented.

| Inbred | Selectable marker | Embryos transformed (number) | T0 plants (number) | T0 transformation (%) | Excised single copy, backbone-free events (number) | Excised single copy, backbone-free events (%) | Excision frequency (%) | Usable event (%) | Null (%) |
|--------|-------------------|------------------------------|--------------------|-----------------------|----------------------------------------------------|-----------------------------------------------|------------------------|------------------|----------|
| HC69   | <i>NPTII</i>      | 315                          | 200                | 63.5                  | 46                                                 | 23.0                                          | 87.1                   | 14.6             | 17.1     |
|        | <i>HRA</i>        | 407                          | 281                | 69.0                  | 45                                                 | 16.0                                          | 82.3                   | 11.1             | 37.3     |
| PH85E  | <i>NPTII</i>      | 219                          | 64                 | 29.2                  | 23                                                 | 35.9                                          | 96.7                   | 10.5             | 15.3     |
|        | <i>HRA</i>        | 320                          | 124                | 38.8                  | 31                                                 | 25.0                                          | 97.2                   | 9.7              | 42.5     |
| PH84Z  | <i>NPTII</i>      | 356                          | 145                | 40.7                  | 19                                                 | 13.1                                          | 50.4                   | 5.3              | 14.2     |
|        | <i>HRA</i>        | 365                          | 169                | 46.3                  | 14                                                 | 8.3                                           | 59.9                   | 3.8              | 41.8     |

7 Data from two independent transformers was used to determine T0 transformation frequency. The quality events (QE) were identified as single copy, backbone-  
 8 free, morphogenic and marker gene-free (excised). The number of QEs was divided by the total number of events analyzed to calculate the QE frequency. The  
 9 excision frequency was determined as the ratio of the number of excised single-copy events relative to the total single-copy events. The usable event (UE)  
 10 frequency is a measure of the number of acceptable transgenic events per 100 embryos that was determined as the product of QE frequency and transformation  
 11 frequency.

12

13

- 1 Table 9. Observed and expected number of homozygous, hemizygous and null plants for T-DNA integration copy number in in T1
- 2 generation of 13 SC excised quality events across two maize inbreds (PH84Z and HC69).

| Inbred | Event ID       | Total Plants | Homozygous | Hemizygous | Null | Chi-square | P-value* |
|--------|----------------|--------------|------------|------------|------|------------|----------|
| PH84Z  | ZMYF66.001.83A | 23           | 7          | 11         | 5    | 0.39       | 0.82     |
|        | ZMCJK9.001.74A | 31           | 10         | 13         | 8    | 0.76       | 0.68     |
|        | ZMCJK9.001.13A | 30           | 8          | 18         | 4    | 2.03       | 0.36     |
|        | ZMCJK9.001.96A | 32           | 6          | 17         | 9    | 0.69       | 0.71     |
|        | ZMCJK9.001.34A | 30           | 10         | 12         | 8    | 1.5        | 0.47     |
|        | ZMCJK9.001.77A | 24           | 5          | 10         | 9    | 2          | 0.36     |
|        | ZMCJK9.001.3A  | 27           | 4          | 17         | 6    | 2.07       | 0.35     |
| HC69   | ZMNW4W.001.72A | 23           | 11         | 7          | 5    | 6.65       | 0.03     |
|        | ZMNW4W.001.30A | 31           | 11         | 13         | 7    | 1.83       | 0.39     |
|        | ZMNW32.001.49A | 32           | 4          | 17         | 11   | 3.19       | 0.2      |
|        | ZMNW32.001.58A | 31           | 8          | 14         | 9    | 0.35       | 0.84     |
|        | ZMNW32.001.43A | 32           | 9          | 10         | 13   | 5.5        | 0.06     |
|        | ZMNW32.001.65A | 32           | 9          | 14         | 9    | 0.5        | 0.78     |

- 3
- 4 \* No statistically significant deviations identified from expected 1:2:1 (homozygous:hemizygous:null) segregation at 5% level

1 **Figure 1.** Schematic representation of an auto-excision construct design used for testing different  
2 developmentally regulated or stress-inducible promoters to achieve excision of morphogenic  
3 genes. A) The excision construct with different promoter combinations driving *Cre* expression  
4 (represented by *pro:CRE*) and the DNA fragment to be excised flanked by two directly oriented  
5 *loxP* recombination sites. B) The excised product following auto-excision. Refer to Table S-1 for  
6 description of construct components used in T-DNA construction.

7

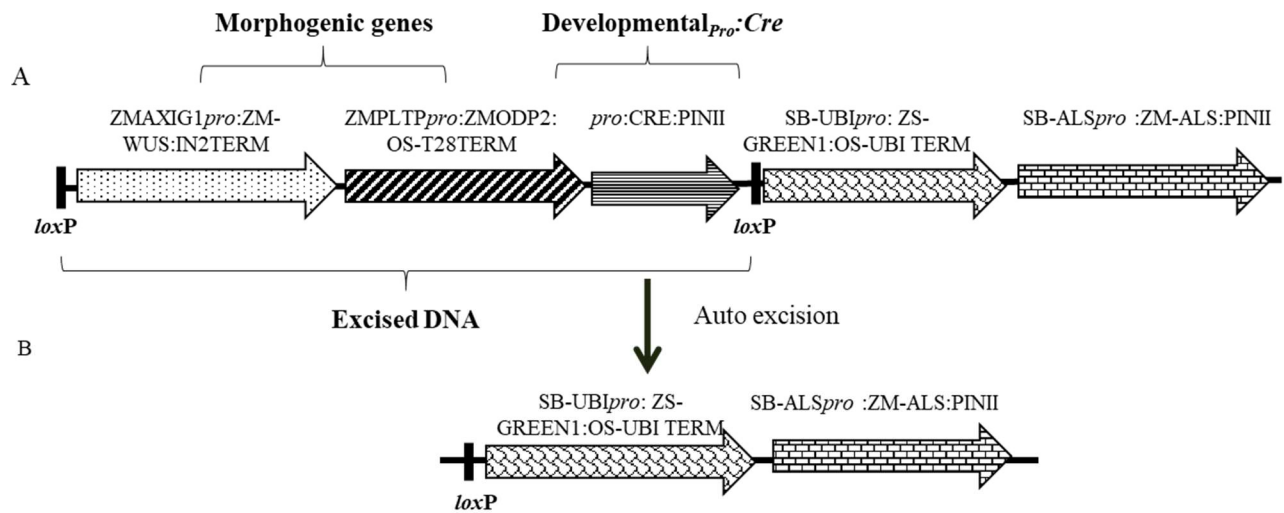

8



- 1 **Figure 2.** Schematic representation of an auto-excision construct design used for testing
- 2 developmentally regulated promoters driving *Cre* expression (represented by *pro:CRE*) for
- 3 excision-activated SMG expression. A) An excision-activated selectable marker construct design
- 4 with the DNA fragment to be excised flanked by two directly oriented *loxP* recombination sites.
- 5 B) Following excision, the *HRA* gene is activated and events are selected on a media
- 6 supplemented with 0.1 mg/L imazapyr. Refer to Table S-1 for description of construct
- 7 components used in T-DNA construction.

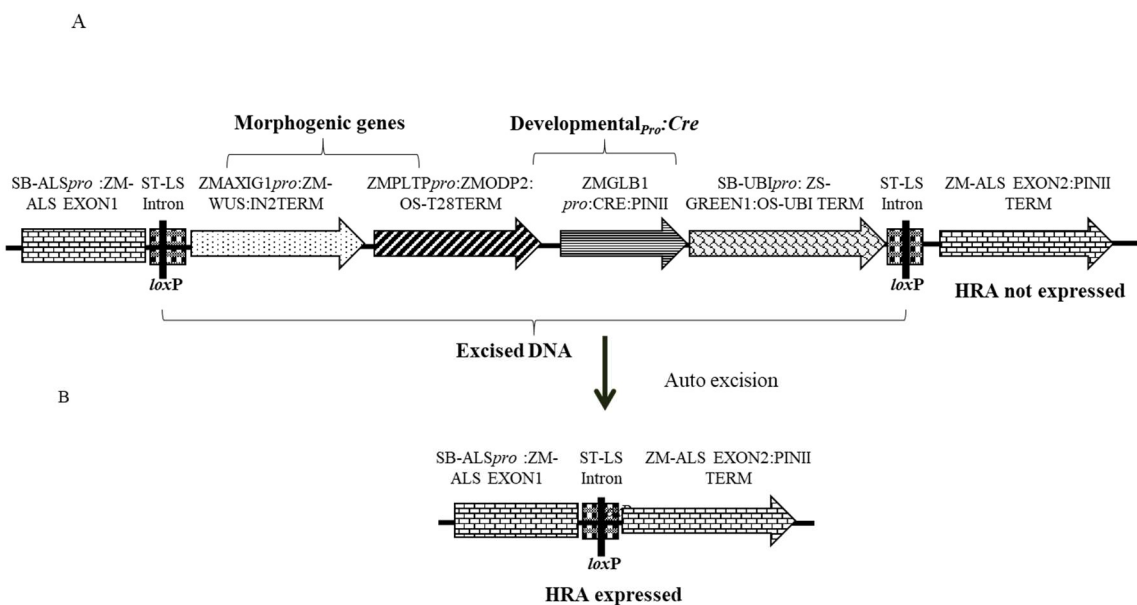

8

- 1 **Figure 3.** The different stages in rapid maize transformation and heat shock treatment. A)
- 2 immature zygotic embryos are isolated and infected with *Agrobacterium tumefaciens*, (B)
- 3 transgenic somatic embryos are placed for 3 weeks on selection media based on selectable
- 4 marker used (*HRA* or *NPTII*), (C) somatic embryos are heat shock treated and transferred to
- 5 maturation media, (D) transgenic plants are regenerated without selection pressure for 2 weeks
- 6 and, (E) regenerated plants are placed on a rooting media for 2-3 weeks.

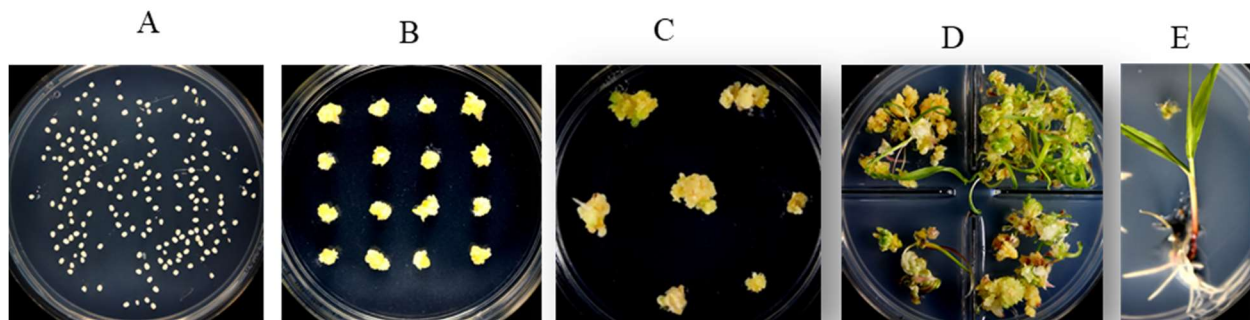

7

1 **Figure 4.** Schematic representation of an auto-excision construct design used for testing  
2 elimination of a morphogenic gene and a marker gene using heat shock promoter driving *Cre*  
3 expression for controlled gene excision. A) Construct design depicting the order of cassettes  
4 including morphogenic genes, *Hsp17.7<sub>pro</sub>* driving *Cre* expression, and the selectable marker  
5 (*HRA* or *NPTII*) flanked by directly oriented *loxP* sites (a) which will be excised upon *Cre*  
6 expression. B) Following excision, the DNA piece containing the ZS-GREEN expression  
7 cassette is left in the T0 event for visual confirmation of excision. Refer to Table S-1 for  
8 description of construct components used in T-DNA construction.

9

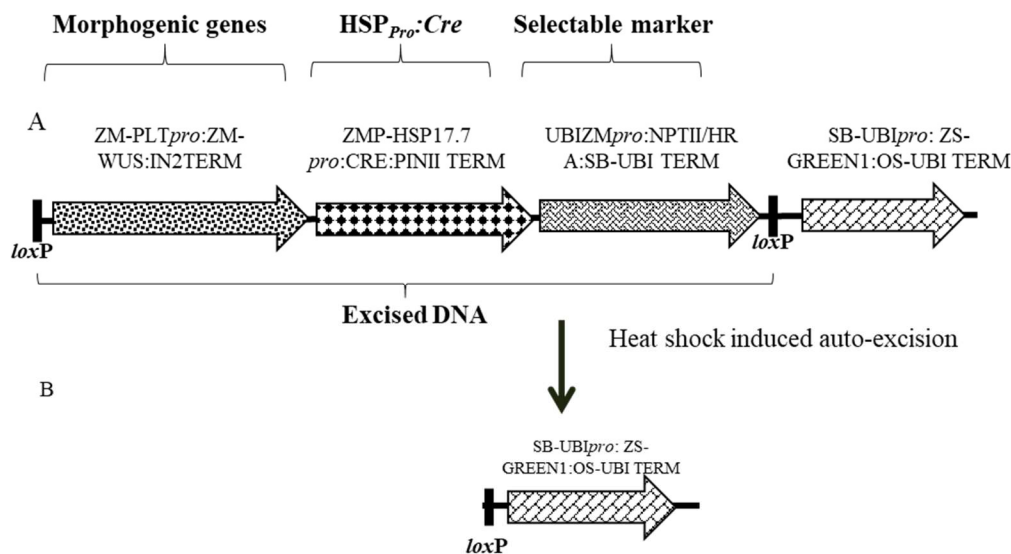

10

1 Table S-1. Construct components used in T-DNA construction.

2

| Component type      | Label                       | Description                                             | References                                                                                                                                                                                                                                                                                                                                                                   |
|---------------------|-----------------------------|---------------------------------------------------------|------------------------------------------------------------------------------------------------------------------------------------------------------------------------------------------------------------------------------------------------------------------------------------------------------------------------------------------------------------------------------|
| <b>Promoters</b>    | <i>Sb-Als<sub>pro</sub></i> | The sorghum ALS promoter                                | SB-ALS promoter and 5'UTR, DOE-JGI Sbi v3.1, SBChr04, bases 49239164-49240031. DOE-JGI Sbi v3.1 corresponds to Sorghum bicolor BTx623 assembly v3.0.1 and gene annotation v3.1 available from phytozome ( <a href="http://phytozome.jgi.doe.gov/">http://phytozome.jgi.doe.gov/</a> ) . Chromosome 4 of Sbi v3.1 is registered as NCBI accessions NC_012873.2 and CM000763.3 |
|                     | <i>Pltp<sub>pro</sub></i>   | Maize phospholipid transferase promoter                 | See GenBank sequence (MN380778)                                                                                                                                                                                                                                                                                                                                              |
|                     | <i>Axig1<sub>pro</sub></i>  | The maize Axig1 promoter                                | (Garnaat et al., 2002)                                                                                                                                                                                                                                                                                                                                                       |
|                     | <i>Sb-Ubipro</i>            | The sorghum Ubiquitin promoter                          | (Shane, 2007)                                                                                                                                                                                                                                                                                                                                                                |
|                     |                             |                                                         |                                                                                                                                                                                                                                                                                                                                                                              |
| <b>3' Sequences</b> | <i>In2-2</i>                | The maize IN2-2 terminator                              | (Hershey and Stoner, 1991)                                                                                                                                                                                                                                                                                                                                                   |
|                     | <i>PINII</i>                | The potato proteinase inhibitor II (pinII) 3' sequence  | (An et al., 1989)                                                                                                                                                                                                                                                                                                                                                            |
|                     | <i>Os-Ubi 3'</i>            | The rice Ubiquitin terminator                           | Terminator region of the rice Ubiquitin (Os06g46770.1), unpublished                                                                                                                                                                                                                                                                                                          |
|                     | <i>Sb-Ubi 3'</i>            | The sorghum Ubiquitin terminator                        | (Shane, 2007)                                                                                                                                                                                                                                                                                                                                                                |
|                     | <i>Os-T28 3'</i>            | The T28 3' regulatory sequence from <i>Oryza sativa</i> | (Bhyri et al., 2014)                                                                                                                                                                                                                                                                                                                                                         |
| <b>Marker genes</b> | <i>NPTII</i>                | Maize codon-optimized Neomycin Phosphotransferase II    | Previously unpublished Corteva Agriscience sequence                                                                                                                                                                                                                                                                                                                          |

|                                         |                  |                                                                                                                          |                            |
|-----------------------------------------|------------------|--------------------------------------------------------------------------------------------------------------------------|----------------------------|
|                                         | <i>HRA</i>       | The maize ALS double mutant gene conferring herbicide resistance                                                         | (Green et al., 2009)       |
|                                         | <i>Zs-YELLOW</i> | The Zs-Yellow1 N1 gene encoding a yellow fluorescent protein from <i>Zoanthus sp</i>                                     | (Matz et al., 1999)        |
| <b>Maize morphogenic genes</b>          | <i>Zm-Wus2</i>   | The maize <i>Wuschel2</i> ( <i>Wus2</i> ) gene                                                                           | (Lowe et al., 2007)        |
|                                         | <i>Zm-Bbm</i>    | The maize <i>Baby boom</i> gene ( <i>Bbm</i> )                                                                           | (Gordon-Kamm et al., 2005) |
| <b>Recombinase Expression Cassettes</b> | <i>Cre</i>       | A maize-optimized <i>Cre</i> recombinase gene (originally from the P1 bacteriophage), with an inserted potato LS1 intron | (Odell et al., 1990)       |
| <b>Recombinase Target Sites</b>         | <i>loxP</i>      | The recombinase target site for the Cre recombinase from <i>E. coli</i>                                                  | (Odell et al., 1990)       |

1
